# Supplementary material for: Trichodysplasia spinulosa-Associated Polyomavirus (TSV) and Merkel Cell Polyomavirus: Correlation between Humoral and Cellular Immunity Stronger with TSV
Source: PubMed Central journal article supplement (PMC3454342; doi:10.1371/journal.pone.0045773), 2012-09-24
Supplement: pone.0045773.s001.pdf [file pone.0045773.s001.pdf]

# Supplement Figure S1

(A)

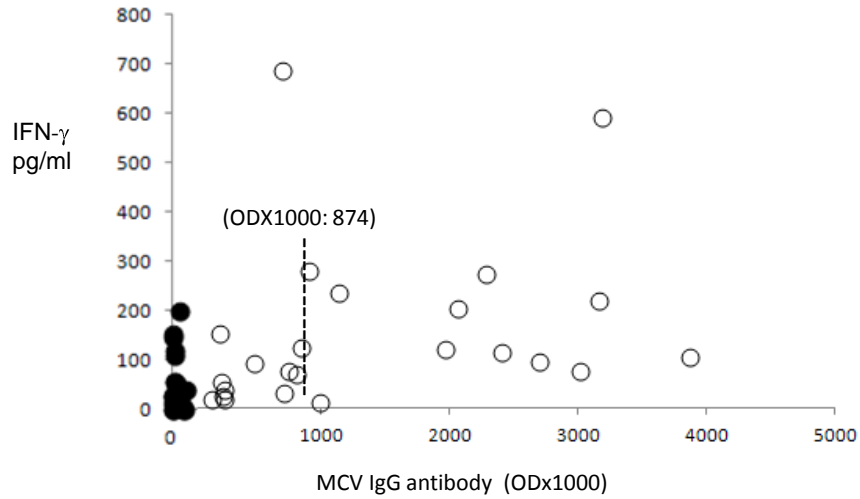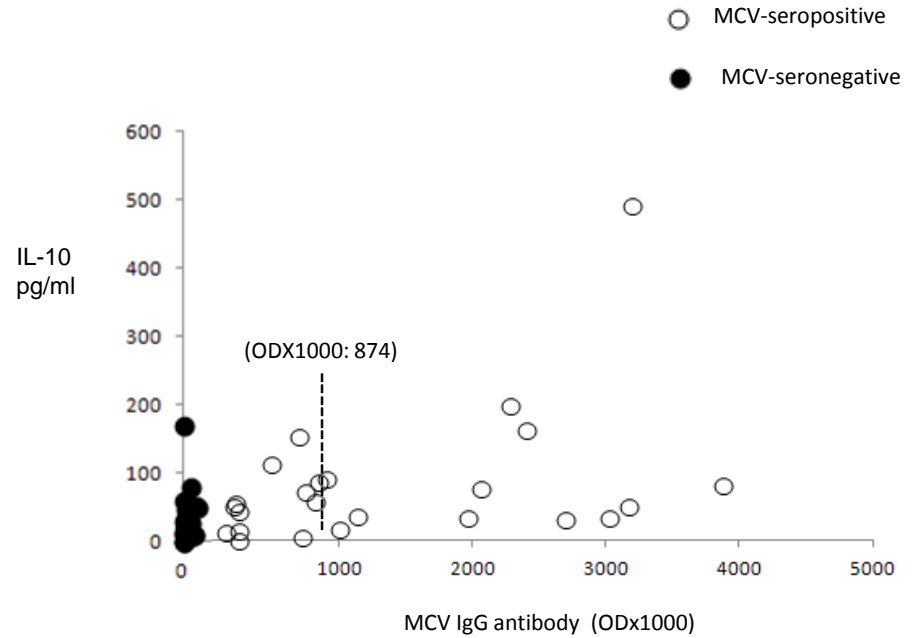

(B)

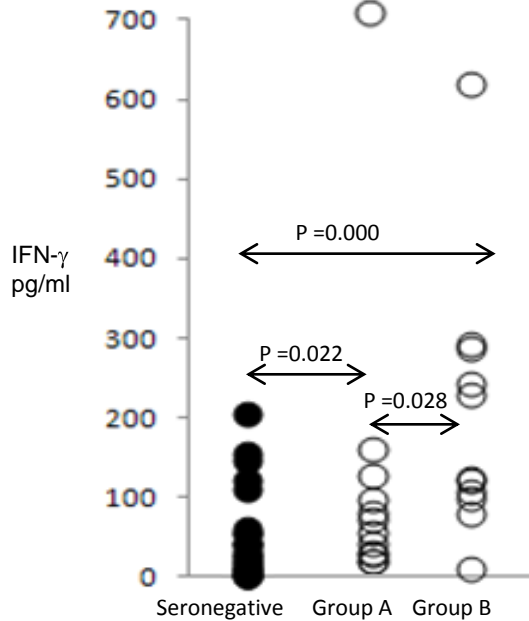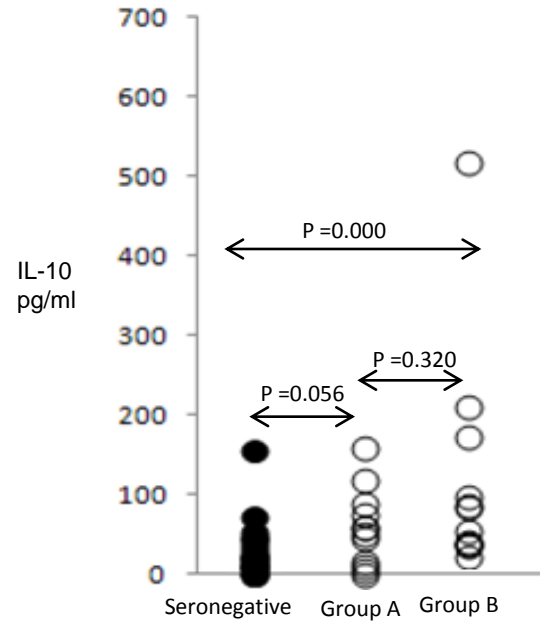

**A) Effect of MCV-specific IgG level on Th-cell responses** . MCV-specific IFN- $\gamma$  and IL-10 responses were plotted against MCV-IgG responses among seropositive (open circles) and seronegative individuals (closed circles). MCV VP1 specific humoral immune response is shown by optical density x 1000 (ODX1000). Median ODX1000 (874) is shown by (---) a line.

**B) Comparison of MCV-specific IFN- $\gamma$  and IL-10 responses among low and high MCV-IgG and MCV-seronegative groups.** MCV-specific IFN- $\gamma$  and IL-10 responses were compared between the MCV- seronegative subjects and sub-groups of MCV-seropositive subjects. Group A: MCV-seropositive subjects having MCV-IgG ODx1000 below 874, and group B: subjects having MCV-IgG ODx1000 above 874.
