# Supplementary material for: Trichodysplasia spinulosa-Associated Polyomavirus (TSV) and Merkel Cell Polyomavirus: Correlation between Humoral and Cellular Immunity Stronger with TSV
Source: PubMed Central journal article supplement (PMC3454342; doi:10.1371/journal.pone.0045773), 2012-09-24
Supplement: pone.0045773.s005.pdf [file pone.0045773.s005.pdf]

## Supplementary Note S1

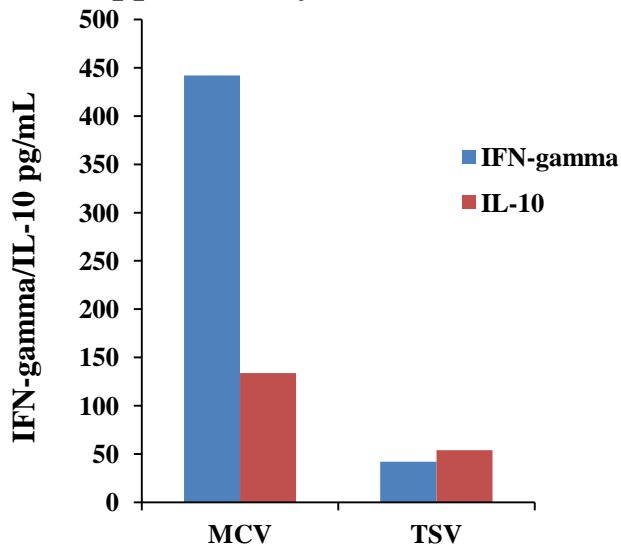

**Table: Kinetics of MCV and TSV-specific IL-10 responses in the MCC patient and in healthy control subjects from 3 and 5 day supernatant**

| Serostatus                                     | Subject | MCV         |     | TSV         |    |
|------------------------------------------------|---------|-------------|-----|-------------|----|
|                                                |         | IL-10 pg/ml |     | IL-10 pg/ml |    |
|                                                |         | 3d          | 5d  | 3d          | 5d |
| <sup>a</sup> MCV <sup>+</sup> TSV <sup>-</sup> | #T1     | 62          | 134 | 154         | 54 |
| MCV <sup>+</sup> TSV <sup>-</sup>              | #T43    | 32          | 202 | 12          | 28 |
| MCV <sup>+</sup> TSV <sup>-</sup>              | #T17    | 28          | 60  | 10          | 20 |
| MCV <sup>+</sup> TSV <sup>+</sup>              | #T46    | 10          | 18  | 4           | 30 |
| MCV <sup>+</sup> TSV <sup>+</sup>              | #T16    | 54          | 160 | 28          | 58 |
| MCV <sup>-</sup> TSV <sup>-</sup>              | #T44    | 16          | 24  | 8           | 46 |

<sup>a</sup>: MCC patient

**Fig. MCV and TSV-specific Th-cell responses in a MCC tumor patient**

### Clinical information of MCC patient

**Age, sex and location of tumor:** 48 years, male, trunk

**Stage of MCC:** T3N1aM0; tumor >5cm with nodal metastasis detected in sentinel node biopsy (AJCC staging system)<sup>1</sup>

**MCV and TSV serostatus:** Pos (MCV), Neg (TSV)

**MCV and TSV DNA status:** In Blood- MCV (Neg), TSV (Neg)  
In Tumor- MCV (Pos), TSV (Neg)

**Treatments :** Radical surgery with 2 cm marginal, sentinel node biopsy followed by complete lymph node dissection, and post operative radiotherapy

**Other information:** Patient is alive, follow up time one year.

### **Immunostaining and histology**

Histology consistent with MCC confirmed by immunohistochemistry:

Panycytokeratin +

CK20 +

BCLA2 +

SYP (synaptophysin) +

ChA (chromogranin A) neg

TTF-1 (thyroid transcriptase factor 1) neg

### **References**

1. Allen PJ, Bowne WB, Jaques DP, Brennan MF, Busam K, et al. (2005) Merkel cell carcinoma: Prognosis and treatment of patients from a single institution. J Clin Oncol 23(10): 2300-2309. 10.1200/JCO.2005.02.329.
